# Supplementary material for: Matched triplicate design sets in the optimisation of glucokinase activators – maximising medicinal chemistry information content
Source: Royal Society of Chemistry journal article supplement (doi:10.1039/c3md20367k), 2013-01-01
Supplement: c3md20367k.pdf [file c3md20367k.pdf]

# Matched triplicate design sets in the optimisation of glucokinase activators –maximising medicinal chemistry information content

Michael J. Waring,\* Stuart N. L. Bennett, Scott Boyd, Leonie Campbell, Robert D. M. Davies, Stefan Gerhardt, David Hargreaves, Nathaniel G. Martin, Graeme R. Robb and Gary Wilkinson.

## Supporting Information

Compound details and data summarised in Table 3

| R3                                                                                  |                        | Mean change <sup>a</sup> | 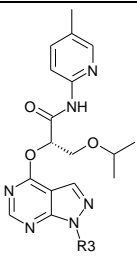 |  |  |  |  |
|-------------------------------------------------------------------------------------|------------------------|--------------------------|-----------------------------------------------------------------------------------|-----------------------------------------------------------------------------------|------------------------------------------------------------------------------------|-------------------------------------------------------------------------------------|-------------------------------------------------------------------------------------|
|   | GK pEC <sub>50</sub>   | Δ +0.7                   | <b>10</b><br>6.9                                                                  | <b>14</b><br>7.1                                                                  |                                                                                    | <b>4</b><br>6.5                                                                     |                                                                                     |
|                                                                                     | LogD                   | Δ +1.0                   | 3.9                                                                               | 3.6                                                                               |                                                                                    | 3.4                                                                                 |                                                                                     |
|                                                                                     | LLE                    | Δ -0.7                   | 3.0                                                                               | 3.5                                                                               |                                                                                    | 3.1                                                                                 |                                                                                     |
|                                                                                     | hERG pIC <sub>50</sub> |                          |                                                                                   |                                                                                   |                                                                                    |                                                                                     |                                                                                     |
|  | GK pEC <sub>50</sub>   | Δ 0                      | 6.8                                                                               | 6.5                                                                               | <b>15</b><br>6.8                                                                   | 6.5                                                                                 | <b>5</b><br>5.8                                                                     |
|                                                                                     | LogD                   | Δ 0                      | 2.9                                                                               | 2.1                                                                               | 2.6                                                                                | 3.0                                                                                 | 2.3                                                                                 |
|                                                                                     | LLE                    | Δ 0                      | 3.9                                                                               | 4.4                                                                               | 4.2                                                                                | 3.5                                                                                 | 3.5                                                                                 |
|  | GK pEC <sub>50</sub>   | Δ -0.2                   | 6.5                                                                               | 6.5                                                                               |                                                                                    | 6.3                                                                                 |                                                                                     |
|                                                                                     | LogD                   | Δ -0.3                   | 2.6                                                                               | 2.3                                                                               |                                                                                    | 2.7                                                                                 |                                                                                     |
|                                                                                     | LLE                    | Δ 0.0                    | 3.9                                                                               | 4.2                                                                               |                                                                                    | 3.6                                                                                 |                                                                                     |
|  | GK pEC <sub>50</sub>   | Δ -0.8                   | 6.0                                                                               |                                                                                   | 5.9                                                                                | 5.8                                                                                 |                                                                                     |
|                                                                                     | LogD                   | Δ 0.0                    | 2.9                                                                               |                                                                                   | 2.5                                                                                | 3.1                                                                                 |                                                                                     |
|                                                                                     | LLE                    | Δ -0.8                   | 3.1                                                                               |                                                                                   | 3.4                                                                                | 2.7                                                                                 |                                                                                     |
|  | GK pEC <sub>50</sub>   | Δ -1.1                   | 5.2                                                                               |                                                                                   | 5.7                                                                                | 6.0                                                                                 |                                                                                     |
|                                                                                     | LogD                   | Δ +0.3                   | 3.2                                                                               |                                                                                   | 2.8                                                                                | 3.3                                                                                 |                                                                                     |
|                                                                                     | LLE                    | Δ -1.3                   | 2.0                                                                               |                                                                                   | 2.9                                                                                | 2.7                                                                                 |                                                                                     |
|  | GK pEC <sub>50</sub>   | Δ -0.7                   | 6.0                                                                               |                                                                                   | 6.2                                                                                | 6.0                                                                                 |                                                                                     |
|                                                                                     | LogD                   | Δ 0.0                    | 2.9                                                                               |                                                                                   | 2.5                                                                                | 3.0                                                                                 |                                                                                     |
|                                                                                     | LLE                    | Δ -0.6                   | 3.1                                                                               |                                                                                   | 3.7                                                                                | 3.0                                                                                 |                                                                                     |

<sup>a</sup>Mean change refers to the average change in value across the matched triplicate set relative to 6-chloropyridin-2-yl

## Synthesis and glucokinase assay

The syntheses of all compounds described in this paper and details of the glucokinase assay are detailed in: PCT Int. Appl. (2010), WO 2010/015849

## ADMET assays

Protocols for generation of relevant ADMET data are described in:

D. Buttar, N. Colclough, S. Gerhardt *et al. Bioorg. Med. Chem.* 2010, **18**, 7486.

G. Camenisch, J. Alsenz, H. van de Waterbeemd and G. Folkers, *Eur. J. Pharm. Sci.*, 1998, **6**, 313.

M. H. Bridgland-Taylor, A. C. Hargreaves, A. Easter *et al. J. Pharmacological and Toxicological Methods*, 2006, **54**, 189.

### Data Analysis

All data analyses were carried in SAS JMP ([www.jmp.com](http://www.jmp.com)).

### X-ray Crystallography

#### Material & Methods

Recombinant human glucokinase comprising residues 11 to 465 (triple mutant E27A E28A/E51A E52A), fused at the *N*-terminus with a six-residue HIS-tag, was expressed over night in *E. coli* at 20°C. The protein was purified by Ni-NTA affinity, and after cleavage of the His-tag with TEV protease, further by ion exchange and size exclusion chromatography. For crystallisation, the protein was concentrated to about 10 mg/mL. The protein was crystallized in the presence of 50 mM glucose and compound **11** which was added to a final concentration of 2 mM from a 100 mM stock solution in DMSO. Crystals were obtained from 10-18% Peg8000, 200 mM sodium acetate, MMT 100 mM at pH 7.0-8.5 by sitting drop vapour diffusion, appearing after 3-4 days and growing to the final size within one week. Crystals were flash-frozen in liquid nitrogen with 25% (v/v) glycerol as cryoprotectant.

Data from crystals were collected in-house on a Rigaku MicroMax-007 rotating anode X-ray generator with and a Saturn944 CCD detector using 1° oscillations. The resulting diffraction data were integrated and scaled using Dtrek<sup>1</sup>. Molecular replacement was successfully used to solve the structure in spacegroup P41 using AMORE<sup>2</sup> and 1V4S as the original search model. Model building and refinement were conducted using COOT<sup>3</sup> and Refmac<sup>4</sup> respectively. Table 1 gives a summary of the data collection and refinement statistics.

The refined coordinates have been deposited with PDB (code: 4IXC)

1. J. W. Pflugrath, *Acta Cryst.* 1999, **D55**, 1718.
2. J. Navaza, *Acta Cryst.a* 1994, **A50**, 157.
3. P. Emsley, K. Cowtan, *Acta Cryst. Section D-Biological Crystallography* 2004, 60: Iss. 1 Part 12, 2126.
4. G. N. Murshudov, A. A. Vagin, E. J. Dodson, , *Acta Cryst.* 1997, **D53**, 240.

**Table 1.** Crystallographic Data Collection and Refinement Statistics for the compound 11 complex.

|                                    |            |                                     |                                                |
|------------------------------------|------------|-------------------------------------|------------------------------------------------|
| Space Group:                       | P41        | Cell Parameters:                    | 77.63 Å, 77.63 Å, 85.82 Å,<br>90.0, 90.0, 90.0 |
| Number Observations:               | 184124     | Number Unique Reflections:          | 31632                                          |
| Low Resolution:                    | 57.75 Å    | Outer Shell Low Resolution:         | 2.07 Å                                         |
| High Resolution:                   | 2.0 Å      | Outer Shell High Resolution:        | 2.00 Å                                         |
| Overall Redundancy:                | 5.82       | Outer Shell Redundancy:             | 1.84                                           |
| Overall I/Sigma:                   | 9.9        | Outer Shell I/Sigma:                | 1.7                                            |
| Overall Completeness:              | 91.9       | Outer Shell Completeness:           | 51.3                                           |
| Overall R-merge <sup>a</sup> :     | 0.078      | Outer Shell R-merge <sup>a</sup> :  | 0.309                                          |
|                                    |            |                                     |                                                |
| Resolution range                   | 54.8-2.0   | Rwork/Rfree %                       | 21.3/26.6                                      |
| No of refined atoms                | 3799       | Rms deviations                      |                                                |
|                                    |            | Bonds ( Å )                         | 0.012                                          |
|                                    |            | Angles(degrees)                     | 1.65                                           |
|                                    |            | Torsions (degrees)                  | 6.49                                           |
| Ramachandran Preferred Regions (%) | 419 (95.9) | Average B factors (Å <sup>2</sup> ) | 28.6                                           |
| Allowed                            | 14 (3.2)   |                                     |                                                |
| Outliers                           | 4 (0.9)    |                                     |                                                |

<sup>a</sup> R-merge =  $\sum |I_{hkl} - \langle I \rangle| / (\sum I_{hkl})$  where  $I_{hkl}$  is the integrated intensity of a given reflection.

<sup>b</sup> Rwork =  $\sum_h |F_o(h) - F_c(h)| / \sum_h |F_o(h)|$  where  $F_o(h)$  and  $F_c(h)$  are observed and calculated structure factors.
